1 Title:

2 Genetic conditionality of strength by the ACE gene in women horse riders

3 Lena Majchrowicz (corresponding author)

4 ORCID: 0000-0001-5171-4060

5 l.majchrowicz@nencki.edu.pl; lenam@op.pl

6 phone: (+48) 602 429 152

7 Laboratory of Neurobiology, Laboratory of Neurobiology, Nencki Institute of

8 Experimental Biology of Polish Academy of Science, Pasteura Street 3, Warsaw,

9 Poland

10

11 Piotr Matłosz

12 ORCID: 0000-0002-7388-5722

13 pmatlosz@ur.edu.pl; piotr.matlosz@gmail.com

14 Department of Health Science, Faculty of Physical Education, University of Rzeszów,

15 Rzeszów, Poland

16

17 Rena Majchrowicz

18 rena.m@o2.pl

19 Student Research Society of Diagnostics in Sport and Health Training, Faculty of

20 Physical Education, University of Rzeszów, Rzeszów, Poland

21

22

23

24 ABSTRACT

25 The sport performance relies on hard work, intensity, duration of workout and  
26 undoubtedly on genetic background. These components fold on multicausal character of  
27 sport achievements. One of the best known genes associated with sport performance is  
28 angiotensin converting enzyme gene (ACE). In this study, we showed ACE distribution  
29 in women horse riders and the correlation between physiological and genetic  
30 background, that should be taken into account when deciding to train sports discipline.  
31 Data from 40 healthy female adults were collected. Participants trained horse-riding for  
32 at least 3 years and participated in sport competition at least at national level and control  
33 group consist of out of training persons. We analysed BMI, %FAT, cardiorespiratory  
34 efficiency (VO2max), Complex Reaction Time, body balance, force and Lower Limbs  
35 Explosive Force between both calculated groups. Physiological data was calculated by  
36 non-parametric Mann-Whitney test with Dunnett's post hoc test. The DNA  
37 amplification from saliva was performed by PCR method to analyze the ACE genotype  
38 distribution. In our study, for the first time we showed that the women training dressage  
39 have higher force and complex reaction time than the control group. It was correlated  
40 with possession of the D allele in genotype that is associated with muscle strength,  
41 efficiency and muscle power. There is no research relating to ACE polymorphism  
42 among horse riders. This paper showed angiotensin converting enzyme gene  
43 distribution polymorphism in female Polish professional horse riders. This article  
44 confirms correlation between genotype, sports results and physiological parameters.

45

47 1. INTRODUCTION

48 Angiotensin converting enzyme (ACE) is well-known and one of the most  
49 frequent under examined gene among sportsmen. An insertion/deletion (I/D)  
50 polymorphism in the ACE gene occurrence is responsible for the control of blood  
51 pressure in the body [1], as well as for predisposition to short-term or strength sports.  
52 It's been long since known that sport success is the sum of genetic predisposition and  
53 regular training. There is a lot of research of frequency of an insertion/deletion of  
54 polymorphism among sportspeople training various olympic disciplines. Lack of  
55 literature concerning I/D ACE polymorphism with horse-riders [1]. The aim of this  
56 study was to show insertion/deletion of polymorphism in the ACE gene correlated with  
57 horse-riders' physical condition and their professing sport discipline and enrich existing  
58 literature about genetics of athletic performance. We also wanted to enrich the current  
59 canon of knowledge about equestrianism.

60 Horse-riding is a highly demanding sport rank among olympic disciplines. It  
61 split into 7 groups: dressage, show jumping, teaming, western riding, vaulting, long-  
62 distance rail and three-day event. Regardless of trained discipline, horse-riding demands  
63 high physical condition, force and strength. Riding is most prestigious and well known  
64 discipline, but not everyone predispose to this sport [2,3].

65 All types of sports are marked by determined physical requirements. Sport qualification  
66 depend on intensity, length of practice and genetic conditioning of individual facilities.  
67 These compounds reflect on the multicasual nature of sport performance [4].

68 Sport efficiency involves interaction between musculoskeletal, cardiovascular,  
69 respiratory and nervous systems. It constitute as one of the most complex properties that  
70 predispose to determinated sport. Differences in efficiency can also be the result of

71 anatomy (height, body composition), strength and force. Aerobic efficiency results from  
72 the cardiovascular system's ability to provide and utilize oxygen for muscles. It is not  
73 correlated with strength performance, which is related to aerobic threshold [5].

74 Muscle power is a muscle strength to quantitative force generation. The  
75 connection between strength and muscle cramp rate is defined as muscle force. It has a  
76 great value in sprint, jumps or weightlifting [6]. Cognitive and environmental factors  
77 (training, nutrition) and injury susceptibility are components of physical fitness. Body  
78 response to physical activity partly depends on genetic factors and differs between  
79 sports [7]. Physical condition (66%), height (80%) or body build are highly inherited  
80 properties connected with force and strength among athletics. Strength and muscle  
81 power phenotype research demonstrate 50% aerobic efficiency heritability and 30- 83%  
82 strength and force heritability dependent upon type and muscle cramp [4].

83 Many genes and gene polymorphisms influence on body efficiency and manual  
84 effort, such as agene converting angiotensin enzyme ACE [1], ACTN3  $\alpha$ -actinin-3 gene  
85 [8], bradykinin  $\beta$ 2BDKBR2 receptor gene [9,10], PPAR  $\alpha$  receptor gene [11,12], GDF-  
86 8 myostatin gene [13,14], APOE apolipoprotein E gene [15]. The ACE gene converting  
87 angiotensin I enzyme, which inactivates bradykinin, is part of the renin- angiotensin  
88 system responsible for controlling blood pressure in the body. The gene encoding ACE  
89 had been localized on 17 chromosomes. Insertion/deletion (I/D) of polymorphism  
90 impacts on the predisposition to short-term or strength sports. I/D of polymorphism  
91 relies on the presence or absence of a 287 bp Alu repeat element in intron 16 of this  
92 gene. The ACE I allele represents an insertion and is associated with lower serum and  
93 tissue ACE activity while the D (deleted) allele is associated with higher serum and  
94 tissue ACE activity. The ACE I/I genotype is associated with endurance performance

95 and higher exercise efficiency and represents competitive sportspeople and among  
96 mountaineers. D/D genotype is associated with strength and power performance.  
97 Differences between frequency of I/D ACE polymorphism was observed in population.  
98 Abilities to physical effort is also modulated by polymorphism variants in other genes  
99 involved in heart and skeletal muscle metabolism [1,4,16].

100 Most research is concentrated on ACE polymorphism among athletics. Lack of  
101 literature concerning I/D polymorphism with horse riders incline us to extend the  
102 knowledge about this sport group. The aim of our study was to show the correlation  
103 between genetic and physical background at equestrianism.

104

## 105 2. MATERIALS AND METHODS

### 106 2.1. *Subject and sample collection.*

107 The study was conducted in accordance with the ethical rules of the Helsinki  
108 Declaration. Forty people were invited to participate in this study. Eligibility criteria  
109 included healthy female adults between the ages of 15 to 35 years old. Participants  
110 trained horse-riding (19 persons) for at least 3 years and participated in sport  
111 competition at least at national level and control group consist of 21 out of training  
112 persons. After explaining the purpose of the study and how to participate, a consent  
113 form or permission slip, containing general information about the examined was  
114 completed and signed by all participants. The survey was completely anonymous. This  
115 study was approved by the [REDACTED] Bioethics Committee (Poland), under  
116 protocol number 2018/01/04.

117 Briefly, participants expectorated at least 5 mL of unstimulated saliva into a  
118 sterile, 20 mL polyethylene tube at least 30 minutes prior to eating, drinking, smoking

119 or kissing to minimize contaminate. Saliva samples were collected from participants and  
120 subjected to extract genomic DNA followed by PCR amplification and analysis for  
121 ACE I/D polymorphism using specific primers. Collection tubes were maintained on ice  
122 and the saliva was aliquoted into sterile 2 mL microcentrifuge tubes containing Saliva  
123 DNA Preservative buffer according to manufacturer. Next, each participant's aliquoted  
124 preserved samples were stored at room temperature for three days. The storage periods  
125 for the saliva aimed to transport samples into laboratory for further analysis.

## 126 *2.2. DNA extraction*

127 The genomic DNA extraction protocols used are described below. For Saliva  
128 DNA Collection, Preservation and Isolation Kit commercial kit (Cat. RU35700,  
129 NorgenBiotek Corp., Thorold, Canada) according to the manufacturer's specific  
130 instructions.

131 Half a milliliter of saliva was collected from each donor into a 2 mL tube (Eppendorf,  
132 Hamburg, Germany) containing 0.5 mL Norgen's Saliva DNA Preservative and mixed  
133 by shaking for 10 seconds. In that manner the saliva sample was preserved for storage,  
134 shipping and processing. The kit's procedure was modified by the collection and  
135 isolation of saliva DNA from 1 ml of preserved saliva samples, and overnight sample  
136 incubation with proteinase K. Isolated DNA was suspended in ddH<sub>2</sub>O. NorgenBiotek  
137 commercial kits, the manufacturer's instructions were followed [17].

## 138 *2.3. Spectrophotometric analysis*

139 The concentrations of DNA from saliva samples were detected using a  
140 NanoDrop 2000 (Thermo Fisher Scientific, Waltham, Massachusetts, USA).  
141 A spectrophotometer at wavelengths of 230 nm, 260 nm and 280 nm was used to  
142 quantify and analyse the condition of each extracted DNA sample from saliva. The

143 concentration and purity of DNA was detected via the relative 260/280 nm and 260/230  
144 nm absorbance ratios. To analyse 1  $\mu$ L of each sample was required. The 260/280 nm  
145 absorbance ratio between 1.6 and 2.0 for samples were considered pure. Ratio lower  
146 than 1.6 testifies to higher protein contaminates [17,18].

#### 147 *2.4. Electrophoretic analysis*

148 To determine the quality and condition of the extracted DNA, samples from  
149 saliva were electrophoresed using a 2% agarose gel in Tris-borate-EDTA (TBE) buffer,  
150 Tris base (100 mM), Boric acid (100 mM) and EDTA (2 mM). Standard molecular  
151 weight GeneRuler DNA Ladder Mix (SM0333; Thermo Fisher Scientific) in the range  
152 of 100 bp to 10,000 bp was loaded onto gel containing Midori Green Advance DNA  
153 Stain (MG04; ABO, Gdańsk, Poland). 10  $\mu$ l of each sample and negative control (10  $\mu$ l  
154 of ddH<sub>2</sub>O) with 2  $\mu$ l loading buffer 6x DNA Gel Loading Dye (R0611, Thermo Fisher  
155 Scientific) were loaded onto gel. Electrophoresis was driven using 100 V  $\sim$  70 mA for  
156 45 minutes at room temperature. Gels were visualized using UV light and photographed  
157 with a digital camera Enduro Gel XL and Transilluminator Gel Vue GVM20 (Syngene,  
158 Cambridge, UK).

#### 159 *2.5. PCR*

160 Conventional PCR was used to investigate extracted DNA. Polymerase chain  
161 reaction detection of the insertion/ deletion polymorphism of human angiotensin  
162 converting enzyme gene (ACE). For the I/D of polymorphism, the following primers  
163 were used to amplify the region of Alu insertion, with the Alu element's presence or  
164 absence being detected by running the product on an agarose gel. The sequences of  
165 primers used were sense oligo: 5'- CTGGAGACCACTCCCATCCTTTCT-3' (forward)  
166 and anti-sense oligo 5'- GATGTGGCCATCACATTCGTCAGAT-3' (reverse).

167 Cycling conditions were 95°C for 5 minutes; then for 40 cycles with denaturation at  
168 95°C for 30 seconds, annealing at 62°C for 30 seconds, extension at 72°C for 30  
169 seconds and final extension at 72°C for 10 minutes by Eppendorf Mastercycler personal  
170 (Eppendorf). Genotypes of all individuals resulted in an amplified fragment of 190 bp  
171 for DD, 490 and 190 bp for ID, and 490 bp for II. The 20 µl reaction mix was composed  
172 of 1x GoTaq G2 Green Master Mix (M7823; Promega, Fitchburg, Wisconsin, USA)  
173 with dNTPs, MgCl<sub>2</sub> and Polymerase, 0.1 µM of each primers (upstream, downstream),  
174 100 ng DNA template and nuclease- free water. As a negative control 2 µl nuclease-free  
175 water was used. Reaction products were analysed in a 2% agarose gel using the same  
176 procedures outlined above (excluding 6x Loading Dye).

#### 177 *2.6. Physiological procedures - Body Mass Index (BMI)*

178 To calculate BMI body height and weight was measured in light clothing and  
179 barefoot. Body height was measured with SECA (Hamburg, Germany) portable  
180 stadiometer to the nearest 0.1 cm according to the protocol recommended by the  
181 International Society for the Advancement of Kinanthropometry (ISAK)[19]. Body fat  
182 percentage (%FAT) and weight were assessed by bioelectrical impedance using Tanita  
183 Body Composition Analyser (TBF-300). BMI was calculated from the equation:  
184  $BMI = \text{body mass (kg)} \cdot \text{stature}^{-1} (\text{m}^2)$ .

#### 185 *2.7. Static Balance test*

186 A postural sway was assessed with baropodometric platform (Sensor Medica –  
187 FreeMedBase, Rome, Italy). Distribution of the ground reaction forces was used to  
188 register Centre Of Pressure (COP) displacements with sampling frequency at the level  
189 of 400 Hz. Subjects performed 3 consecutive trials of maximal voluntary forward (FL)  
190 and then backward leaning (BL) (Limits Of Stability test - LOS test) proposed by Juras



191 et al. [20]. Subjects stand barefoot on the force platform with feet in natural position,  
192 with arms by their sides and palms directed to thighs. Subjects were instructed to look  
193 straight ahead on fixation point placed 2 m away on the wall. The procedure started with  
194 10 seconds of quiet standing and then after acoustic signal subjects executed the leaning  
195 movement at their own pace until they reached their maximal range. After reaching  
196 maximal leaning subjects maintained position to the end of trial (approximately 15  
197 seconds), each trial lasted 30 seconds. Subjects were instructed to execute the leaning  
198 only by movement in ankle joint, without raising their heels, or bending in their hip  
199 joints or lumbar part of spine. For each trial of forward and backward leaning phase,  
200 quantitative measurements of anterior - posterior sway amplitude ( $\Delta X$ ) were assessed to  
201 assess limits of stability of each subject.

#### 202 *2.8. Lower limbs explosive force, anaerobic power and complex reaction time (RT)* 203 *assessment*

204 Optojump Next System (Microgate, Bolzano, Italy) was used for lower limbs  
205 explosive force, anaerobic power and complex reaction time (RT) assessment.  
206 Optojump is an optical measurement system which consist of two parallel bars- one  
207 receiver and one transmitter unit. The transmitter bar contains light emitting diodes  
208 which communicate continuously with those on the receiving bar. The system detects  
209 any interruptions in communication between the bars and calculates their duration  
210 measuring thereby flight and contact times during the performance of a series of jumps  
211 with an accuracy of 0.001 of a second. Jump height was then estimated as  $9.81 \cdot \text{flight}$   
212  $\text{time}^2 \cdot 8^{-1}$  [21]. Bars were placed approximately 1 m apart and parallel to each other.  
213 Lower limbs visual and acoustic complex reaction time test involve performance of a  
214 jump starting from squad jump position. It was not specified whether the stimulus were

215 to be visual or acoustic. The subject must react to both stimuli. The test result was the  
216 average response time of three jumps. Evaluation of lower limbs explosive force  
217 involve Counter Movement Jump (CMJ). Subjects perform a single jump starting from  
218 an upright position with hands on hips and with counter movement. Subjects were  
219 instructed to stand straight up for 1 - 2 seconds and jump as high as it is possible. Single  
220 jump started with straight legs and performed a natural flexion before take off. Analysis  
221 of anaerobic power involves performance of 15 seconds of jumps, subjects were  
222 instructed to perform as many highest jumps as possible during a 15 seconds period.  
223 Test result was the average jump power.

#### 224 *2.9. Cardiorespiratory efficiency test*

225 Cardiorespiratory fitness was assessed one week apart with aerobic capacity  
226 field test - 20 m shuttle run published by Leger et al. [22]. Subjects run as long as  
227 possible with continuous movement back and forth between two lines 20 m apart, while  
228 keeping the pace with audio signals. The initial speed was  $8.5 \text{ km}\cdot\text{h}^{-1}$  and was increased  
229 by  $0.5 \text{ km}\cdot\text{h}^{-1}$  each minute (each stage lasted approximately 1 min). Participants were  
230 instructed to run in a straight line, to pivot on completing a shuttle, and to pace  
231 themselves in accordance with the audio signals. The subjects were encouraged to keep  
232 running as long as possible. The test was finished when the participant failed to reach  
233 the end lines concurrent with the audio signals on two consecutive occasions or when  
234 the subject stopped because of fatigue. All participants received a comprehensive  
235 instruction about the test after which they also practiced the test. They also were  
236 instructed to abstain from intense exercises 48 h prior to the test. Tests were carried out  
237 under standardized conditions on an outdoor court with hard surface.

238 The maximal shuttle run speed was used to estimate subjects  $VO_{2max}$  using Léger and  
239 Gadoury equation for adults:  $VO_{2max} = -32.678 + 6.592 V$ , where “V” =last completed  
240 stage speed in  $km \cdot h^{-1}$  [23].

241

## 242 3. RESULTS

### 243 3.1. Molecular analysis

244 Performed PCR amplification of DNA from saliva samples showed extensive  
245 variability of genotypes in examined people. Insertion allele was identified at size 490  
246 kb and Deletion allele at 190 kb in agarose electrophoresis (Fig.1.).

247 Please insert figure 1 about here

248 Fig.1. Photography of PCR product showing the ACE genotype distribution among  
249 examined people. Lane: 1, 4, 9, 10 - heterozygous I/D; 2, 5 - homozygous I/I; 3, 6, 7, 8 -  
250 homozygous D/D; M - DNA ladder.

251 ACE genotype frequency distribution measured by Pearson`s Chi-square ( $\chi^2$ )  
252 test showed not statistically significant differences between control (CTR) and horse  
253 riders (HS) groups. The Chi-square statistic was 1.9973. The p-value was 0.368376. The  
254 result was not significant at  $0.001 > p < 0.05$ . 38% of control group had predisposition to  
255 high-performance long-distance sports (I/I genotype), 62% to short-term effort and  
256 requiring more muscle strength, efficiency and muscle power (I/D and D/D genotype).  
257 Among horse riders sport predispositions were 37% and 63% (respectively) (Fig.2.).

258 Please insert figure 2 about here

259 Fig.2. Angiotensin converting enzyme (ACE) genotype frequency distribution measured  
260 by Pearson`s Chi-square ( $\chi^2$ ) (A) and measured as a percentage (B) in control (CTR)

261 and horse riders (HR) group. Insertion/ Insertion genotype (I/I), Insertion/ Deletion  
262 genotype (I/D), Deletion/ Deletion genotype (D/D).

263

### 264 3.2. *Physiological analysis*

265 Due to the small number of male riders for further analysis we took a group that  
266 included only women. We also analysed, BMI, %FAT, cardiorespiratory efficiency  
267 ( $VO_{2max}$ ), Complex Reaction Time (CRT), body balance, force and Lower Limbs  
268 Explosive Force (LLEF) between both calculated groups. Physiological data was  
269 calculated by non-parametric Mann-Whitney test (one-way ANOVA) with Dunnett's  
270 post hoc test. No statistically significant differences were observed between control and  
271 horse riders groups in BMI (0.1917), %FAT (0.8927),  $VO_{2max}$  (0.4519), CRT (0.1320),  
272 balance in posterior (0.1503) and anterior (0.7702) groups and LLEF (0.3971). Only  
273 differences at  $p < 0.01$  level between force in analysed groups were observed. The p-  
274 value was 0.0032.

275 BMI in all was normal and ranged from 18.2 - 25.7 and 17.1 - 23.8 in control  
276 and horse riders group respectively. %FAT in control group was between 13.1 - 30.5%  
277 and in examined group was between 10.1 - 31.6%. The higher  $VO_{2max}$  (49.72 ml·kg-  
278  $1 \cdot \text{min}^{-1}$ ) was observed in control group and the lower was 36,54 ml·kg-1·min<sup>-1</sup>. Horse  
279 riders were 49.72 ml·kg<sup>-1</sup>·min<sup>-1</sup> and 33.24 ml·kg<sup>-1</sup>·min<sup>-1</sup> respectively. Maximum 245.78  
280 mm X axis length (anterior) and 175.66 mm of Y axis length (posterior) and minimum  
281 105.05 mm and 70.97 mm (posterior) were observed in non-training persons. Second  
282 group were maximum 223.66 mm and 152.39 mm and minimum 99.68 mm and 69.83  
283 respectively. Complex reaction time oscillated between 0.61 - 0.92 seconds and 0.52 -  
284 1.01 seconds in controls and horse riders group respectively. Lower limbs explosive was

285 between 18.5 - 38.0 cm (CTR) and 19.4 - 34.6 cm (HR). CTR force ranged from 28.97  
286 to 42.2 W·kg<sup>-1</sup> and HR 25.47 - 61.36 W·kg<sup>-1</sup>.

287 Moreover, we have classified horse riders into 2 groups. The first one consisted  
288 of athletes training jumps, the second were training dressage. We compared every of  
289 each groups to control with one-way ANOVA and Dunnett's a post hoc test. Significant  
290 differences were observed only between second study group in force ( $p < 0.01$ ) and CRT  
291 ( $p < 0.05$ ) (Fig.3.).

292 Please insert figure 3 about here

293 Fig.3. Force and Complex Reaction Time distribution in horse riders training dressage;  
294 \*\*\* $p < 0.001$ , \*\* $p < 0.01$ , \* $p < 0.05$ , no indication - no statistical significance (one-way  
295 ANOVA and Dunnett's a post hoc test). Data presented as mean  $\pm$  SEM; \*\* $P < 0.01$ , by  
296 non-parametric Mann-Whitney test.

297

#### 298 4. DISCUSSION

299 Polymorphism in angiotensin converting enzyme gene is one of the most  
300 frequent examined factors related to sports predispositions. ACE gene is also associated  
301 with differences with blood pleasure [24] and fertility [1,25], cardiovascular diseases  
302 [1,26–28], neurological diseases like Parkinson`s disease [1,29] or Alzheimer disease  
303 [1,30,31]. Since years, many of scientists study the role of Insertion/ Deletion  
304 polymorphism and their correlation between genetic and physiological backgrounds in  
305 sportspeople. Most research was concentrated on polymorphism in angiotensin  
306 converting enzyme (ACE) among athletes [32–36], swimmers [1,37,38], football  
307 players [39], volleyball players [24,40] or ball games players [41]. There is no research  
308 relating to ACE polymorphism among horse riders.

309           In this study, we examined angiotensin converting enzyme gene distribution  
310 polymorphism in female Polish professional horse riders (jumps and dressage  
311 discipline) for the first time. ACE I/I and I/D genotype dominated among examined  
312 sportswomen. Moreover, we compared the genomic and physiological results and  
313 referred them to control group. D/D and I/I was the most common in control group.  
314 Our hypothesis assumed correlation between genotype, sports results and physiological  
315 parameters.

316           We demonstrated that female horse riders especially training dressage have  
317 higher force and complex reaction time than sedentary people. These physiological  
318 results correlated with possession of D allele in genotype which is associated with  
319 muscle strength, efficiency and muscle power.

320           Genetic background of sport predisposition is relatively easy to verify by  
321 molecular biology technics. ACE polymorphisms in combination with physiological  
322 tests results, should be taken into account when deciding to train sports discipline in  
323 order to achieve success in sport. Nowadays, some medical facilities offer a genetic  
324 testing detecting possible polymorphisms within genes: ACTN3, ACE, HIF1A and  
325 EPOR what correlate with physiological predispositions to sport.

326

## 327 5. CONCLUSION

328           Our hypothesis assumed correlation between genotype, sports results and  
329 physiological parameters. We demonstrated that female HR especially training dressage  
330 have higher anaerobic power and CRT than CTR. These physiological results correlated  
331 with possession of D allele in genotype which is associated with muscle strength,  
332 efficiency and muscle power. In conclusion, ACE polymorphisms combine

333 physiological tests results, should be taken into account when deciding to train sports  
334 discipline to achieve success in sport.

335

336

337 Acknowledgements

338 The authors would like to thank [REDACTED]

339 [REDACTED] for the help in performing physiological tests, [REDACTED]

340 [REDACTED] for statistical help.

341 This work was supported by the [REDACTED] from the funds of Student

342 Research Society of Diagnostics in Sport and Health Training.

343

344 Disclosure statement

345 The authors declare no conflict of interest.

346

347 Funding

348 This work was supported by the University of Rzeszów from the funds of

349 Student Research Society of Diagnostics in Sport and Health Training.

350

351 References

352 1. Sayed-Tabatabaei FA, Oostra BA, Isaacs A, Van Duijn CM, Wittteman JCM.

353 ACE polymorphisms. *Circulation Research*. 2006. pp. 1123–1133.

354 doi:10.1161/01.RES.0000223145.74217.e7

355 2. Douglas J-L, Price M, Peters DM. A systematic review of physical fitness,

356 physiological demands and biomechanical performance in equestrian athletes.

- 357           Comp Exerc Physiol. 2012;8: 53–62. doi:10.3920/CEP12003
- 358    3.    Gutierrez Rincon JA, Vives Turco J, Muro Martinez I, Casas Vaque I. A  
359           comparative study of the metabolic effort expended by horse riders during a  
360           jumping competition. Br J Sports Med. 1992;26: 33–35.  
361           doi:10.1136/bjism.26.1.33
- 362    4.    Guth LM, Roth SM. Genetic influence on athletic performance. Current Opinion  
363           in Pediatrics. 2013. pp. 653–658. doi:10.1097/MOP.0b013e3283659087
- 364    5.    Burnley M, Jones AM. Oxygen uptake kinetics as a determinant of sports  
365           performance. Eur J Sport Sci. 2007;7: 63–79. doi:10.1080/17461390701456148
- 366    6.    Folland JP, Williams AG. Morphological and Neurological Contributions to  
367           Increased Strength. Sport Med. 2007;37: 145–168. doi:10.2165/00007256-  
368           200737020-00004
- 369    7.    Puthuchery Z, Skipworth JRA, Rawal J, Loosemore M, Van Someren K,  
370           Montgomery HE. Genetic influences in sport and physical performance. Sports  
371           Medicine. 2011. pp. 845–859. doi:10.2165/11593200-000000000-00000
- 372    8.    Yang N, MacArthur DG, Gulbin JP, Hahn AG, Beggs AH, Easteal S, et al.  
373           ACTN3 Genotype Is Associated with Human Elite Athletic Performance. Am J  
374           Hum Genet. 2003;73: 627–631. doi:10.1086/377590
- 375    9.    Grenda A, Leońska-Duniec A, Ciężczyk P, Zmijewski P. Bdkrb2 gene -9/+9  
376           polymorphism and swimming performance. Biol Sport. 2014/04/05. 2014;31:  
377           109–113. doi:10.5604/20831862.1096047
- 378    10.   Saunders CJ, Xenophontos SL, Cariolou MA, Anastassiades LC, Noakes TD,  
379           Collins M. The bradykinin  $\beta$ 2 receptor (BDKRB2) and endothelial nitric oxide  
380           synthase 3 (NOS3) genes and endurance performance during Ironman Triathlons.



- 381 Hum Mol Genet. 2006;15: 979–987.
- 382 11. Lopez-Leon S, Tuvblad C, Forero DA. Sports genetics: the PPARA gene and  
383 athletes' high ability in endurance sports. A systematic review and meta-analysis.  
384 Biol Sport. 2015/11/19. 2016;33: 3–6. doi:10.5604/20831862.1180170
- 385 12. Tural E, Kara N, Agaoglu SA, Elbistan M, Tasmektepligil MY, Imamoglu O.  
386 PPAR- $\alpha$  and PPARGC1A gene variants have strong effects on aerobic  
387 performance of Turkish elite endurance athletes. Mol Biol Rep. 2014;41: 5799–  
388 5804. doi:10.1007/s11033-014-3453-6
- 389 13. Desgeorges MM, Devillard X, Toutain J, Castells J, Divoux D, Arnould DF, et al.  
390 Pharmacological inhibition of myostatin improves skeletal muscle mass and  
391 function in a mouse model of stroke. Sci Rep. 2017;7: 14000.  
392 doi:10.1038/s41598-017-13912-0
- 393 14. Elkasrawy MN, Hamrick MW. Myostatin (GDF-8) as a key factor linking muscle  
394 mass and bone structure. J Musculoskelet Neuronal Interact. 2010;10: 56–63.
- 395 15. Tierney RT, Mansell JL, Higgins M, McDevitt JK, Toone N, Gaughan JP, et al.  
396 Apolipoprotein e genotype and concussion in college athletes. Clin J Sport Med.  
397 2010;20: 464–468. doi:10.1097/JSM.0b013e3181fc0a81
- 398 16. Dhar S, Ray S, Dutta A, Sengupta B, Chakrabarti S. Polymorphism of ACE gene  
399 as the genetic predisposition of coronary artery disease in Eastern India. Indian  
400 Heart J. 2012;64: 576–581. doi:10.1016/j.ihj.2012.08.005
- 401 17. Garbieri TF, Brozoski DT, Dionísio TJ, Santos CF, Neves LT das. Human DNA  
402 extraction from whole saliva that was fresh or stored for 3, 6 or 12 months using  
403 five different protocols. J Appl Oral Sci. 2017;25: 147–158. doi:10.1590/1678-  
404 77572016-0046

- 405 18. Gudiseva H V, Hansen M, Gutierrez L, Collins DW, He J, Verkuil LD, et al.  
406 Saliva DNA quality and genotyping efficiency in a predominantly elderly  
407 population. *BMC Med Genomics*. 2016;9: 17. doi:10.1186/s12920-016-0172-y
- 408 19. Norton K, Olds T, Olive S, Craig N. Anthropometry and sports performance.  
409 *Anthropometrica*. 1996; 287–364.
- 410 20. Juras G, Słomka K, Fredyk A, Sobota G, Bacik B. Evaluation of the Limits of  
411 Stability (LOS) Balance Test. *J Hum Kinet*. 2008;19: 39–52.  
412 doi:10.2478/v10078-008-0003-0
- 413 21. Bosco C, Luhtanen P, Komi P V. A simple method for measurement of  
414 mechanical power in jumping. *Eur J Appl Physiol Occup Physiol*. 1983;50: 273–  
415 282. doi:10.1007/BF00422166
- 416 22. Léger LA, Mercier D, Gadoury C, Lambert J. The multistage 20 metre shuttle run  
417 test for aerobic fitness. *J Sports Sci*. 1988;6: 93–101.  
418 doi:10.1080/02640418808729800
- 419 23. Léger LA, Gadoury C. Validity of the 20 m shuttle run test with 1 min stages to  
420 predict VO<sub>2</sub>max in adults. *Can J Sport Sci*. 1989;14: 21–26.
- 421 24. Durmic TS, Zdravkovic MD, Djelic MN, Gavrilovic TD, Djordjevic Saranovic  
422 SA, Plavsic JN, et al. Polymorphisms in ACE and ACTN3 Genes and Blood  
423 Pressure Response to Acute Exercise in Elite Male Athletes from Serbia. *Tohoku*  
424 *J Exp Med*. 2017;243: 311–320. doi:10.1620/tjem.243.311
- 425 25. Krege JH, John SWM, Langenbach LL, Hodgin JB, Hagaman JR, Bachman ES,  
426 et al. Male □ female differences in fertility and blood pressure in ACE-deficient  
427 mice. *Nature*. 1995;375: 146.
- 428 26. de Carvalho SS, Simões e Silva AC, Sabino A de P, Evangelista FCG, Gomes

- 429 KB, Dusse LMS, et al. Influence of ACE I/D Polymorphism on Circulating  
430 Levels of Plasminogen Activator Inhibitor 1, D-Dimer, Ultrasensitive C-Reactive  
431 Protein and Transforming Growth Factor  $\beta$ 1 in Patients Undergoing  
432 Hemodialysis. *PLoS One*. 2016;11: e0150613.
- 433 27. Oudit GY, Crackower MA, Backx PH, Penninger JM. The Role of ACE2 in  
434 Cardiovascular Physiology. *Trends Cardiovasc Med*. 2003;13: 93–101.  
435 doi:[https://doi.org/10.1016/S1050-1738\(02\)00233-5](https://doi.org/10.1016/S1050-1738(02)00233-5)
- 436 28. Agerholm-Larsen B, Nordestgaard BG, Tybjaerg-Hansen A. ACE gene  
437 polymorphism in cardiovascular disease: Meta-analyses of small and large  
438 studies in whites. *Arterioscler Thromb Vasc Biol*. 2000;20: 484–492.  
439 doi:[10.1161/01.ATV.20.2.484](https://doi.org/10.1161/01.ATV.20.2.484)
- 440 29. Mellick GD, Buchanan DD, McCann SJ, Davis DR, Le Couteur DG, Chan D, et  
441 al. The ACE Deletion Polymorphism Is Not Associated with Parkinson’s  
442 Disease. *Eur Neurol*. 1999;41: 103–106. doi:[10.1159/000008012](https://doi.org/10.1159/000008012)
- 443 30. Lehmann DJ, Cortina-Borja M, Warden DR, Smith AD, Slegers K, Prince JA, et  
444 al. Large Meta-Analysis Establishes the ACE Insertion-Deletion Polymorphism  
445 as a Marker of Alzheimer’s Disease. *Am J Epidemiol*. 2005;162: 305–317.
- 446 31. Kehoe PG, Katzov H, Feuk L, Bennet AM, Johansson B, Wilman B, et al.  
447 Haplotypes extending across ACE are associated with Alzheimer’s disease. *Hum*  
448 *Mol Genet*. 2003;12: 859–867. doi:[10.1093/hmg/ddg094](https://doi.org/10.1093/hmg/ddg094)
- 449 32. Shahmoradi S, Ahmadalipour A, Salehi M. Evaluation of ACE gene I/D  
450 polymorphism in Iranian elite athletes. *Adv Biomed Res*. 2014;3: 207.  
451 doi:[10.4103/2277-9175.143242](https://doi.org/10.4103/2277-9175.143242)
- 452 33. Ma F, Yang Y, Li X, Zhou F, Gao C, Li M, et al. The Association of Sport

- 453 Performance with ACE and ACTN3 Genetic Polymorphisms: A Systematic  
454 Review and Meta-Analysis. *PLoS One*. 2013;8: e54685.
- 455 34. Holdys J, Kryściak J, Stanisławski D, Groniek P. ACE I/D Gene Polymorphism in  
456 Athletes of Various Sports Disciplines. *Hum Mov*. 2011;12: 223–231.  
457 doi:<https://doi.org/10.2478/v10038-011-0022-x>
- 458 35. Nazarov IB, Woods DR, Montgomery HE, Shneider O V, Kazakov VI, Tomilin  
459 N V, et al. The angiotensin converting enzyme I/D polymorphism in Russian  
460 athletes. *Eur J Hum Genet*. 2001;9: 797.
- 461 36. Gayagay G, Yu B, Hambly B, Boston T, Hahn A, Celermajer DS, et al. Elite  
462 endurance athletes and the ACE I allele - The role of genes in athletic  
463 performance. *Hum Genet*. 1998;103: 48–50. doi:10.1007/s004390050781
- 464 37. Tsianos G, Sanders J, Dhamrait S, Humphries S, Grant S, Montgomery H. The  
465 ACE gene insertion/deletion polymorphism and elite endurance swimming. *Eur J*  
466 *Appl Physiol*. 2004;92: 360–362. doi:10.1007/s00421-004-1120-7
- 467 38. Woods D, Hickman M, Jamshidi Y, Brull D, Vassiliou V, Jones A, et al. Elite  
468 swimmers and the D allele of the ACE I/D polymorphism. *Hum Genet*.  
469 2001;108: 230–232. doi:10.1007/s004390100466
- 470 39. Ciężczyk P, Jastrzębski Z, Zarębska A, Sawczyn M, Drobnik-Kozakiewicz I,  
471 Leońska-Duniec A, et al. Association between the ACE I/D polymorphism and  
472 physical activity in Polish women. *TRENDS Sport Sci*. 2016.
- 473 40. Ulucan K, Sercan C, Biyikli T. Distribution of Angiotensin-1 Converting  
474 Enzyme Insertion/Deletion and  $\alpha$ -Actinin-3 Codon 577 Polymorphisms in  
475 Turkish Male Soccer Players. *Genet Epigenet*. 2015;7: 1–4.  
476 doi:10.4137/GEG.S31479

- 477 41. Jang Y, Kim SM. Influences of the G2350A polymorphism in the ACE Gene on  
478 cardiac structure and function of ball game players. *J Negat Results Biomed*.  
479 2012;11. doi:10.1186/1477-5751-11-6  
480

482 Figure Legends

483

484 Fig.1. Photography of PCR product showing the ACE genotype distribution among  
485 examined people. Lane: 1, 4, 9, 10 - heterozygous I/D; 2, 5 - homozygous I/I; 3, 6, 7, 8 -  
486 homozygous D/D; M - DNA ladder

487

488 Fig.2. Angiotensin converting enzyme (ACE) genotype frequency distribution measured  
489 by Pearson's Chi-square ( $\chi^2$ ) (A) and measured as a percentage (B) in control (CTR)  
490 and horse riders (HR) group. Insertion/ Insertion genotype (I/I), Insertion/ Deletion  
491 genotype (I/D), Deletion/ Deletion genotype (D/D).

492

493 Fig.3. Force and Complex Reaction Time distribution in horse riders training dressage;  
494 \*\*\*p <0.001, \*\*p <0.01, \*p <0.05, no indication - no statistical significance (one-way  
495 ANOVA and Dunnett's a post hoc test). Data presented as mean  $\pm$  SEM; \*\*P <0.01, by  
496 non-parametric Mann-Whitney test.

497

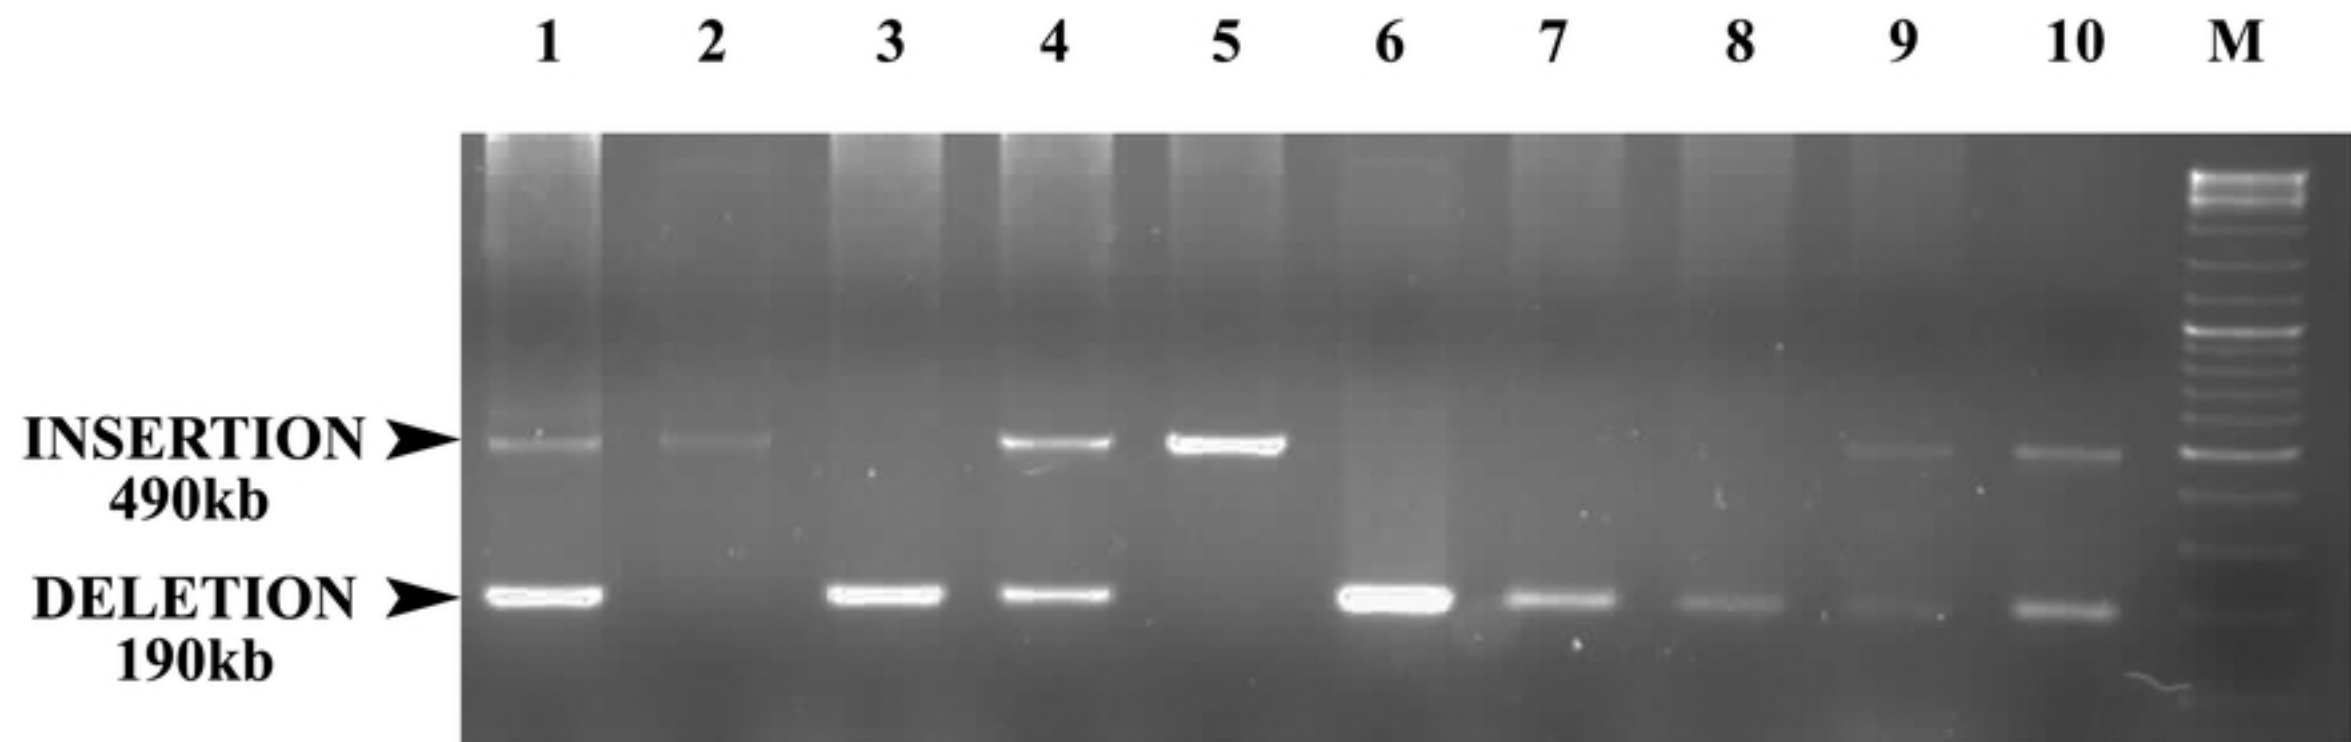

Figure 1

| <b>GROUP</b>      | <b>D/D</b> | <b>I/I</b> | <b>I/D</b> | <b>Total</b> |
|-------------------|------------|------------|------------|--------------|
| <b>CTR</b>        | 8          | 8          | 5          | 21           |
| <b>HR</b>         | 4          | 7          | 8          | 19           |
| <b>All Groups</b> | 12         | 15         | 13         | 40           |

**A**

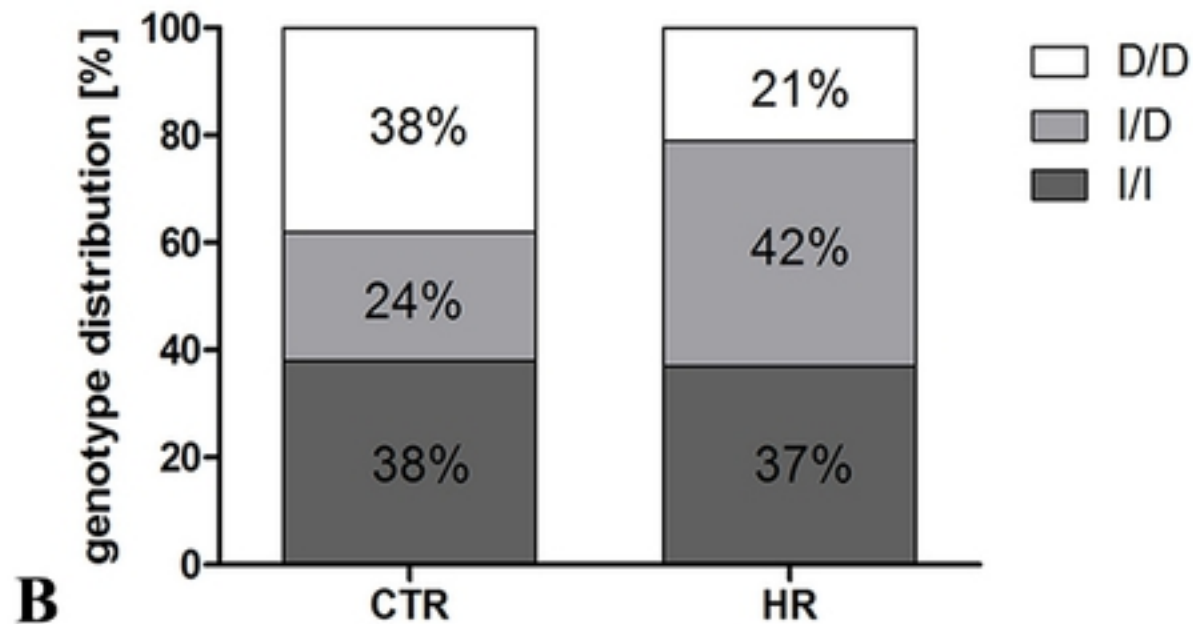

Figure 2



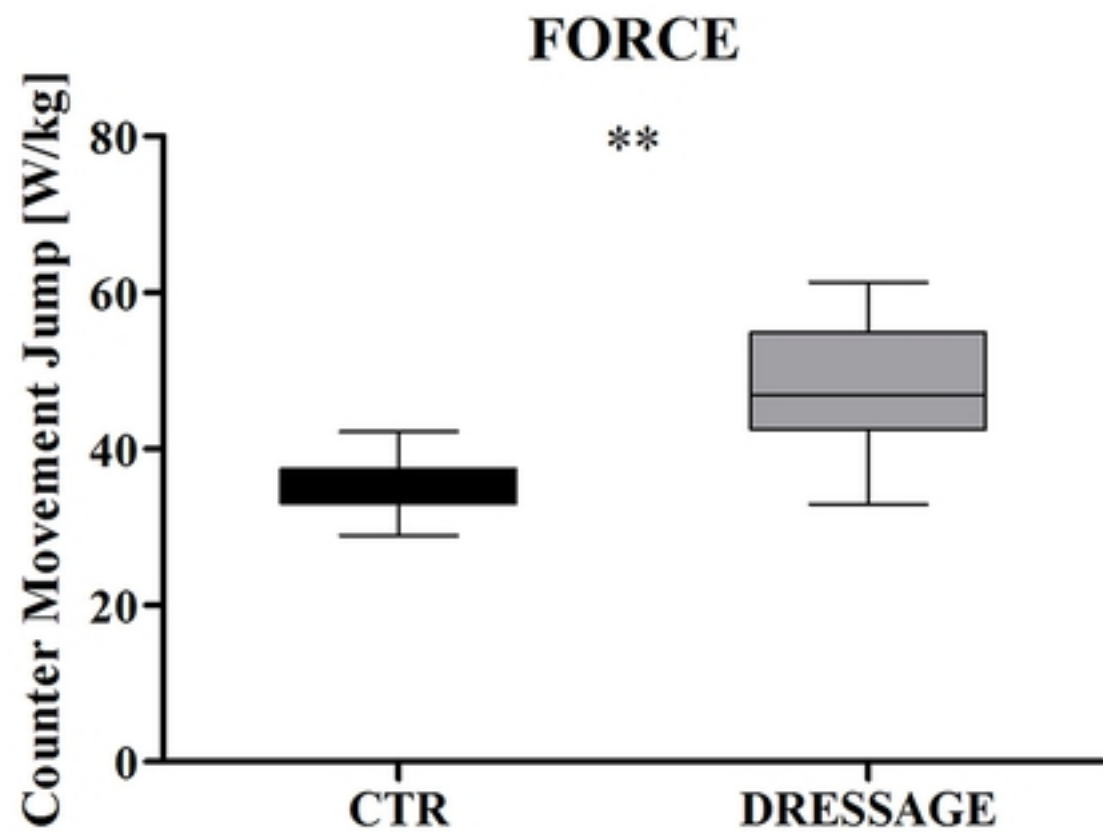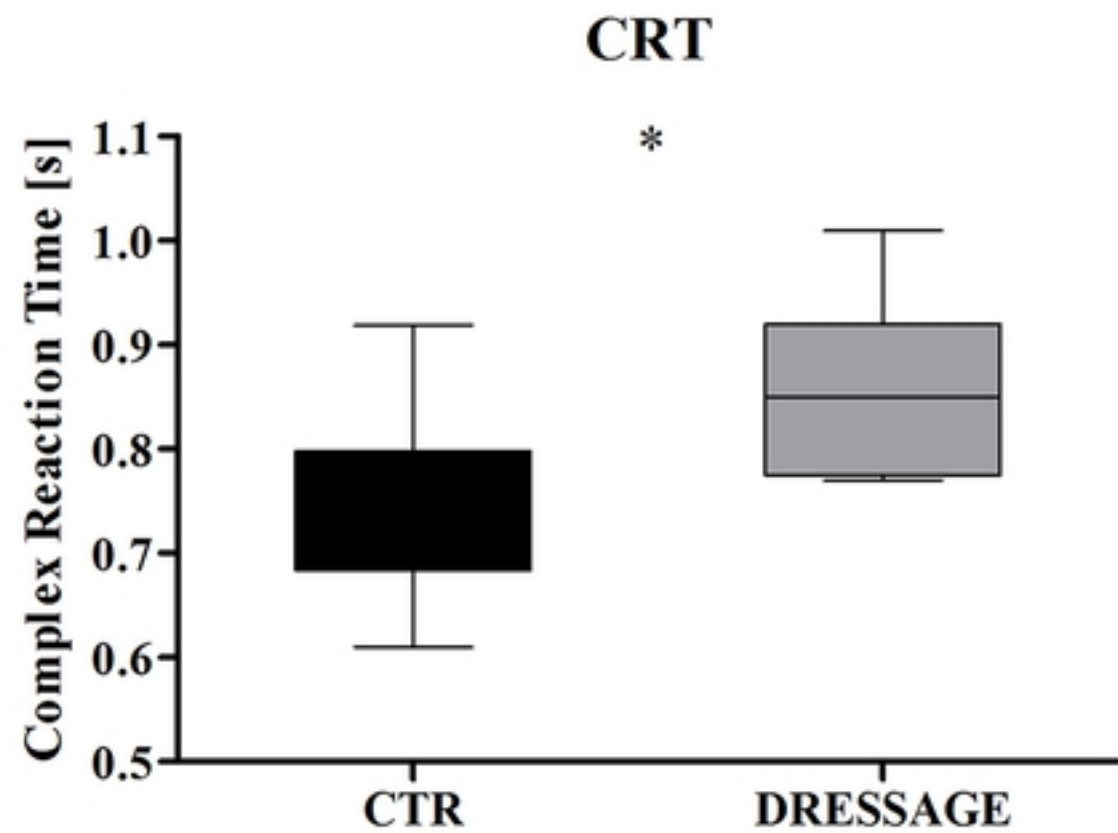

Figure 3
